# Supplementary material
Source: publisher figshare collection journal article supplement (https://tandf.figshare.com/ndownloader/files/30819008)
Supplement: Supplementary file 1 [file 30819008]

## Sheet: List of Companies
List of large corporations with climate or carbon neutrality commitments
Source: based on information retrieved from ECIU and Oxford Net Zero:eciu.net/netzerotracker, NewClimate Institute https://newclimate.org/ambitiousactions climateaction.unfccc.int/ as well as additional research by Lukas Hermwille and Franziska Jüde.
* data on annual revenue retrieved from https://www.forbes.com/global2000/ if available, otherwise retrieved from company webpages
#	company name	country code	industry	annual revenue* [billion USD]	target year	complete GHG coverage	offsetting intended	scope 3 emissions included	Reference
1	Walmart	USA	Retail	524	2040	No	No	Yes	https://corporate.walmart.com/sustainability-timeline
2	Sinopec	CHN	Energy & Utility	369.2	2050	Unclear	Unclear	Unclear	http://www.sinopecgroup.com/group/en/Resource/pdf/SustainReport2020en.pdf
3	Royal Dutch Shell	NLD	Energy & Utility	311.6	2050	No	Yes	Yes	https://www.shell.com/energy-and-innovation/the-energy-future/shells-ambition-to-be-a-net-zero-emissions-energy-business.html
4	Amazon	USA	Retail	296.3	2040	No	Yes	Yes	https://sustainability.aboutamazon.com/about/the-climate-pledge
5	Toyota Motor	JPN	Automotive	280.5	2050	No	Unclear	No	https://global.toyota/pages/global_toyota/sustainability/report/sdb/sdb19_en.pdf#page=52
6	Volkswagen Group	DEU	Automotive	275.2	2050	No	Yes	No	http://newsroom.vw.com/vehicles/what-becoming-carbon-neutral-means-to-volkswagen-and-why-its-the-only-way-forward/
7	BP	GBR	Energy & Utility	271.6	2050	Yes	Yes	Yes	https://www.bp.com/en/global/corporate/news-and-insights/press-releases/bernard-looney-announces-new-ambition-for-bp.html
8	Apple	USA	ICT	267.7	2030	No	Yes	Yes	https://www.apple.com/au/newsroom/2020/07/apple-commits-to-be-100-percent-carbon-neutral-for-its-supply-chain-and-products-by-2030/
9	CVS Health	USA	Retail	256.8	2030	Yes	Unclear	No	https://cvshealth.com/news-and-insights/articles/our-commitment-to-reducing-our-greenhouse-gas-emissions
10	Glencore International	CHE	Basic Raw Materials	215.1	2050	Yes	Yes	Yes	https://www.glencore.com/dam/jcr:c1e7faf7-1928-4251-819e-aa8918be42ba/2020-climate-report.pdf
11	Daimler	DEU	Automotive	189.2	2040	No	Yes	No	https://www.daimler.com/sustainability/climate/climate-pledge.html
12	AT&T	USA	ICT	179.2	2035	Yes	Yes	Yes	https://about.att.com/story/2020/att_carbon_neutral.html
13	Total	FRA	Energy & Utility	176.2	2050	Yes	Yes	Yes	https://www.total.com/sites/g/files/nytnzq111/files/documents/2020-10/total-climate-report-2020.pdf
14	Alphabet	USA	ICT	166.3	2030	No	Yes	Yes	https://www.gstatic.com/gumdrop/sustainability/247-carbon-free-energy.pdf
15	Google (Alphabet)	USA	ICT	160.74	2007	Yes	No	No	https://services.google.com/fh/files/misc/google_2019-environmental-report.pdf
16	AXA Group	FRA	Finance	150	2050	Yes	Unclear	No	https://www-axa-com.cdn.axa-contento-118412.eu/www-axa-com%2F26e79c8c-0f77-4e6b-bb65-cda939bbe8b5_2019+climate+strategy+-+public+detailed+document-b.pdf
17	Ford Motor	USA	Automotive	149.9	2050	No	Yes	No	https://media.ford.com/content/fordmedia/fna/us/en/news/2020/06/24/ford-expands-climate-change-goals.html
18	JPMorgan Chase	USA	Finance	142.9	2050	No	Unclear	Yes	https://www.jpmorganchase.com/news-stories/jpmorgan-chase-adopts-paris-aligned-financing-commitment
19	Microsoft	USA	ICT	138.6	2030	No	No	Yes	https://blogs.microsoft.com/blog/2020/01/16/microsoft-will-be-carbon-negative-by-2030/
20	General Motors	USA	Automotive	137.2	2040	Unclear	Unclear	Yes	https://www.gmsustainability.com/_pdf/resources-and-downloads/GM_2019_SR.pdf
21	Verizon Communications	USA	ICT	131.4	2035	No	Yes	No	https://www.verizon.com/about/news/verizon-goes-carbon-neutral-2035
22	BNP Paribas	FRA	Finance	128	2017	Yes	Yes	No	https://group.bnpparibas/en/news/closer-carbon-neutrality-bnp-paribas
23	Allianz	GER	Finance	122.4	2050	Yes	Unclear	No	https://www.allianz.com/en/sustainability/low-carbon-economy/climate-change/net-zero-asset-owner-alliance.html
24	BMW Group	GER	Automotive	116.6	2050	Unclear	Unclear	Unclear	https://climateaction.unfccc.int/views/stakeholder-details.html?id=10054
25	LukOil	RUS	Energy & Utility	116.3	2050	Unclear	Unclear	No	https://uk.reuters.com/article/russia-lukoil-idAFR4N2AR014
26	Bank of America	USA	Finance	112.1	2021	No	Yes	Yes	https://newsroom.bankofamerica.com/press-releases/environment/bank-america-achieves-carbon-neutrality
27	Home Depot	USA	Retail	110.2	2035	No	Unclear	No	https://corporate.homedepot.com/sites/default/files/image_gallery/The%20Home%20Depot%20Carbon%20Footprint%20Oct%202018.pdf
28	Comcast	USA	Media	108.7	2050	No	Unclear	No	https://corporate.comcast.com/values/report/2019/sustainability/drive-to-zero-emissions
29	Hon Hai Precision Industry (Foxconn)	TWN	Technology Hardware and Equipment	102.564	2050	Yes	Unclear	Unclear	https://www.honhai.com/en-us/press-center/press-releases/latest-news/473
30	General Electric	USA	Energy & Utility	99.9	2030	No	Unclear	No	https://www.ge.com/sites/default/files/GEA19007_Climate_Change_Statement_2020.pdf
31	Siemens	DEU	Technology Hardware and Equipment	97.4	2030	No	Unclear	No	https://new.siemens.com/global/en/company/sustainability/decarbonization/carbonneutral.html
32	Nissan Motor	JPN	Automotive	96.3	2050	Unclear	Unclear	No	https://www.nissan-global.com/EN/ENVIRONMENT/GREENPROGRAM/FRAMEWORK/
33	JXTG Holdings	JPN	Energy & Utility	95.5	2040	Unclear	Yes	No	https://www.hd.eneos.co.jp/english/csr/environment/management.html
34	Nestlé	CHE	Food/Beverages	93.1	2050	Yes	Yes	Yes	https://www.nestle.com/media/pressreleases/allpressreleases/nestle-climate-change-commitment-zero-net-emissions-2050
35	Dell Technologies	USA	Technology Hardware and Equipment	91.9	2050	No	Unclear	No	https://i.dell.com/sites/content/corporate/corp-comm/en/Documents/DellClimatePolicyPrinciples.pdf
35	Generali Group	ITA	Finance	91.9	2050	Yes	Unclear	No	https://www.generali.com/it/our-responsibilities/our-commitment-to-the-environment-and-climate/greenhouse-gas-emissions
37	Deutsche Telekom	GER	ICT	90.1	2040	Unclear	Yes	No	https://www.telekom.com/en/corporate-responsibility/news-corporate-responsibility/climate-neutrality-dt-leads-the-way-in-climate-protection-581534#:~:text=Group%2Dwide%20climate%20neutrality%20by,meet%20the%201.5%20degree%20target.
38	Aviva	GBR	Finance	89.5	2016	No	Yes	No	https://unfccc.int/climate-action/momentum-for-change/climate-neutral-now/aviva-s-climate-neutral-plan
39	Santander	ESP	Finance	89.2	2020	No	Yes	No	https://www.santander.com/en/press-room/press-releases/santander-commits-to-becoming-carbon-neutral-in-2020
40	Bosch	DEU	Technology Hardware and Equipment	88	2020	Yes	Yes	Yes	https://www.bosch.com/company/sustainability/environment/
41	Enel	ITA	Energy & Utility	86.6	2050	Yes	Unclear	Yes	https://www.enel.com/it/investitori/sostenibilita/temi-performance-sostenibilita/emissioni-gas-effetto-serra
42	HSBC	GBR	Finance	86.131	2005	No	Yes	No	https://www.banktrack.org/download/carbon_neutrality_plan/080206_hsbc_and_carbon_neutrality_feb_2008.pdf
43	Legal & General Group	GBR	Finance	85.2	2050	No	Unclear	No	https://www.legalandgeneralgroup.com/media/17877/lg_sustainability_report_2019_v2-2.pdf
44	Reliance Industries	IND	Energy & Utility	84.8	2035	Unclear	Yes	No	https://economictimes.indiatimes.com/industry/energy/oil-gas/reliance-to-replace-auto-fuels-with-electricity-hydrogen-targets-carbon-zero-co-by-2035/articleshow/76982300.cms
45	Peugeot	FRA	Automotive	83.6	2050	No	Yes	Yes	https://www.groupe-psa.com/content/uploads/2019/04/Groupe_PSA_Climate_Report.pdf
46	Hitachi	JPN	Technology Hardware and Equipment	82.9	2050	No	Unclear	No	https://www.hitachi.com/rev/column/afe/vol02/index.html#:~:text=Hitachi's%20Environmental%20Vision%20and%20Long%2Dterm%20Targets,-Hitachi%20engages%20in&text=Based%20on%20an%20IPCC%20scenario,by%2080%25%20relative%20to%20FY2010.
47	Tesco	GBR	Retail	82.7	2050	Yes	Unclear	Yes	https://www.tescoplc.com/sustainability/planet/climate-change/carbon-footprint/
48	EDF	FRA	Energy & Utility	79.8	2050	Yes	Yes	Yes	https://www.edf.fr/en/the-edf-group/our-raison-d-etre
49	Sony	JPN	Technology Hardware and Equipment	79.2	2050	Yes	No	No	https://www.sony.net/SonyInfo/csr/eco/RoadToZero/gm_en.html
50	Aeon	JPN	Food/Beverages	78.9	2050	No	Unclear	No	https://www.aeon.info/export/sites/default/common/images/en/pressroom/imgsrc/180328R_3.pdf
51	Target	USA	Retail	78	2050	Unclear	Unclear	Yes	https://corporate.target.com/article/2019/03/climate-goals
52	IBM	USA	ICT	76.5	2030	unclear	Yes	unclear	https://newsroom.ibm.com/2021-02-16-IBM-Commits-To-Net-Zero-Greenhouse-Gas-Emissions-By-2030
53	Facebook	USA	ICT	73.4	2030	Yes	Unclear	No	https://sustainability.fb.com/wp-content/uploads/2020/07/Sustainability_Report_2019-2.pdf
54	Eni	ITA	Energy & Utility	72.5	2050	Yes	Unclear	Yes	https://www.eni.com/assets/documents/ita/sostenibilita/2019/Eni-for-2019-neutralita-carbonica-nel-lungo-termine.pdf
55	Zurich Insurance Group	CHE	Finance	71.8	2014	No	Yes	No	https://www.zurich.com/en/sustainability/our-role-in-society/climate-change/carbon-neutral
56	Deutsche Post	GER	Logistics	70.9	2050	Unclear	Unclear	No	https://www.dhl.com/global-en/home/about-us/delivered-magazine/articles/2017/issue-2-2017/zero-emissions-by-2050.html#:~:text=You%20are%20here-,Zero%20emissions%20by%202050%3A%20DHL%20announces%20ambitious%20new%20environmental%20protection,zero%20by%20the%20year%202050.
57	ArcelorMittal	LUX	Basic Raw Materials	70.5	2050	Unclear	Unclear	Yes	https://corporate-media.arcelormittal.com/media/yw1gnzfo/climate-action-in-europe.pdf
58	Panasonic	JPN	Technology Hardware and Equipment	70.4	2050	No	Yes	No	https://www.panasonic-batteries.com/en/news/panasonic-environment-vision-2050-our-commitments-become-carbon-neutral
59	Procter & Gamble	USA	Consumer Products and Durables	70.3	2030	Yes	Unclear	No	https://www.pg.co.uk/policies-and-practices/environmental-policies-and-practices/
60	MetLife	USA	Finance	69	2020	No	Unclear	No	https://sustainabilityreport.metlife.com/report/environment/
61	PepsiCo	USA	Food/Beverages	68.2	2050	Yes	Unclear	Yes	https://www.pepsico.com/sustainability/focus-areas/climate
62	ENGIE	FRA	Energy & Utility	67.2	2050	No	Unclear	No	https://www.engie.com/en/group/our-vision/commitments-for-the-climate
62	HSBC Holdings	GBR	Finance	67.2	2030	No	Yes	Yes	https://www.hsbc.com/who-we-are/hsbc-news/hsbc-sets-out-net-zero-ambition
64	Mitsui	JPN	Basic Raw Materials	65.5	2050	Yes	Yes	Yes	https://www.mitsui.com/jp/en/sustainability/sustainabilityreport/2020/pdf/en_sustainability_2020-12.pdf
65	Banco Bradesco	BRA	Finance	62	2019	Yes	Yes	Yes	https://www.bradescori.com.br/siteBradescoRI/Uploads/Arquivos/Comunicados/3630/3630_2_Notice%20to%20the%20Market.pdf
66	Roche Holding	CHE	Pharma & Biotech	61.9	2050	Yes	No	No	https://www.roche.com/sustainability/environment/our_she_goals_and_performance.htm
67	Equinor	NOR	Energy & Utility	60.3	2050	Yes	Yes	Yes	https://www.equinor.com/en/news/20201102-emissions.html
68	Manulife	CAN	Finance	58.3	2050	Yes	Unclear	Yes	https://www.manulife.com/content/dam/corporate/global/en/documents/pas/MFC_ClimateChangeStatement_EN.pdf
69	Unilever	USA	Food/Beverages	58.2	2039	Yes	Yes	Yes	https://www.unilever.co.uk/news/press-releases/2020/unilever-sets-out-new-actions-to-fight-climate-change-and-protect-and-regenerate-nature-to-preserve-resources-for-future-generations.html
70	Nippon Steel	JPN	Basic Raw Materials	55.7	2030	No	Yes	Yes	https://www.nipponsteel.com/common/secure/en/csr/report/nsc/pdf/report2020.pdf
71	Repsol	ESP	Energy & Utility	55.2	2050	Yes	Yes	No	https://www.repsol.com/en/sustainability/sustainability-strategy/governance-bodies/index.cshtml
72	VINCI	FRA	Construction and Construction Materials	54.6	2050	Yes	Unclear	Yes	https://www.vinci.com/vinci.nsf/en/press-releases/pages/20200115-1745.htm
73	Telefónica	ESP	ICT	54.2	2030	Unclear	Unclear	Yes	https://www.telefonica.com/en/web/press-office/-/telefonica-brings-its-zero-emissions-target-forward-to-2030
74	Goldman Sachs Group	USA	Finance	53.9	2030	Yes	Unclear	Yes	https://www.goldmansachs.com/insights/pages/gs-research/carbonomics-green-engine-of-economic-recovery-f/report.pdf
75	Posco	KOR	Basic Raw Materials	53.2	2050	Yes	Unclear	Yes	http://corporatecitizenship.posco.com/citizen/resources/file/report/eng/2020_POSCO_CLIMATE_ACTION_REPORT.pdf
76	Morgan Stanley	USA	Finance	53	2050	No	Yes	Yes	https://www.morganstanley.com/press-releases/morgan-stanley-announces-commitment-to-reach-net-zero-financed-e
77	LG Electronics	KOR	ICT	52.5	2030	No	Unclear	No	https://www.lg.com/uk/about-lg/press-media/LG-COMMITS-TO-CARBON-NEUTRALITY-BY-2030
78	América Móvil	MEX	ICT	52.3	2050	Unclear	Unclear	Unclear	https://www.unglobalcompact.org/take-action/events/climate-action-summit-2019/business-ambition/business-leaders-taking-action
79	Itau Unibanco Holding	BRA	Finance	52	2050	Yes	Yes	Yes	https://www.bradescosustentabilidade.com.br/site/conteudo/interatividade/noticias-det.aspx?id=491
80	Lenovo Group	HKG	Technology Hardware and Equipment	51.8	2050	Yes	Yes	Yes	https://www.lenovo.com/us/en/social_responsibility/2017.18-lenovo-sustainability-report.pdf
81	State Bank of India	IND	Finance	51.1	2030	Unclear	Unclear	No	https://economictimes.indiatimes.com/industry/banking/finance/banking/sbi-announces-steps-to-go-carbon-neutral-by-2030/articleshow/65855255.cms?from=mdr
82	RBC	CAN	Finance	50.9	2025	Yes	Yes	Yes	http://www.rbc.com/community-sustainability/_assets-custom/pdf/RBC-Climate-Blueprint.pdf
83	Bayer	GER	Pharma & Biotech	49.9	2030	No	Yes	No	https://media.bayer.com/baynews/baynews.nsf/id/Bayer-to-significantly-step-up-its-sustainability-efforts
83	Sumitomo	JPN	Technology Hardware and Equipment	49.9	2050	No	Yes	Yes	https://www.sumitomocorp.com/en/jp/sustainability/environmental-management/climate
85	Continental	DEU	Consumer Products and Durables	49.8	2050	No	No	No	https://www.continental.com/resource/blob/218780/387ac18207dd43b39b828f06e8bf7c20/gri-report-2019-en-data.pdf
86	Vodafone	GBR	ICT	49.4	2050	No	No	No	https://www.vodafone.com/our-purpose/planet/reducing-emissions-in-our-operations#:~:text=We%20are%20committed%20to%20halving,emissions%20no%20later%20than%202050.
87	Swiss Re	CHE	Finance	49	2030	No	Yes	No	https://www.swissre.com/media/news-releases/nr-20200220-swiss-re-takes-further-steps-towards-net-zero-emissions.html
88	Novartis	CHE	Pharma & Biotech	48.6	2030	No	Yes	Yes	https://www.novartis.com/our-company/corporate-responsibility/environmental-sustainability/climate
89	Tokio Marine Holdings	JPN	Finance	48.5	2013	No	Yes	Yes	https://www.tokiomarinehd.com/en/release_topics/release/h10q7e000000l1ci-att/20180824CSR_e.pdf
90	Saint Gobain	FRA	Basic Raw Materials	47.7	2050	Unclear	Unclear	Unclear	https://climateaction.unfccc.int/views/stakeholder-details.html?id=9525
90	Saint-Gobain	FRA	Basic Raw Materials	47.7	2050	No	Unclear	No	https://www.saint-gobain.com/en/net-zero-carbon
92	Orange	FRA	ICT	47.3	2040	Yes	Yes	Yes	https://www.orange.com/en/environmental-commitment-orange-vows-achieve-net-zero-carbon-emissions-2040
93	American Express	USA	Finance	46.8	2025	Yes	Yes	Yes	https://about.americanexpress.com/corporate-responsibility/sustainability/sustainability/default.aspx
94	CNP Assurances	FRA	Finance	46.6	2050	Yes	Unclear	No	https://www.cnp.fr/en/the-cnp-assurances-group/newsroom/press-releases/2019/cnp-assurances-joins-the-net-zero-asset-owner-alliance-and-commits-to-a-carbon-neutral-investment-portfolio-by-2050
95	E.ON	GER	Energy & Utility	45.9	2050	Yes	Unclear	Yes	https://www.eon.com/en/about-us/sustainability/strategy.html
96	BHP Group	AUS	Basic Raw Materials	45.8	2050	Yes	Yes	No	https://www.bhp.com/-/media/documents/investors/annual-reports/2020/200910_bhpclimatechangereport2020.pdf
97	Delta Air Lines	USA	Aviation	45.1	2030	No	Unclear	No	https://news.delta.com/delta-commits-1-billion-become-first-carbon-neutral-airline-globally
98	Baosteel	CHN	Basic Raw Materials	45	2050	Unclear	Unclear	Unclear	https://mp.weixin.qq.com/s/rdz0nYFv1J8RM_S77nMhZw / https://twitter.com/YanQinyq/status/1351769754227372032
99	TD Bank Group	CAN	Finance	44.8	2030	Yes	Unclear	Yes	https://www.td.com/document/PDF/ESG/2019-TCFD-Report.pdf
100	Accenture	IRE	Business Services & Supplies	44.7	2040	Unclear	Yes	Unclear	https://www.accenture.com/ma-en/about/corporate-citizenship/environment
100	GlaxoSmithKline	GBR	Pharma & Biotech	44.7	2050	No	Unclear	Yes	https://www.gsk.com/en-gb/responsibility/environment/
100	ThyssenKrupp Group	DEU	Basic Raw Materials	44.7	2050	No	No	No	https://ucpcdn.thyssenkrupp.com/_binary/UCPthyssenkruppAG/en/company/sustainability/integrated-reporting/link-thyssenkrupp-gb-2018-2019-en-web.pdf
103	Deutsche Bahn	GER	Logistics	44	2050	Unclear	Unclear	Unclear	https://gruen.deutschebahn.com/en/focustopics/Carbon-free
104	American Airlines Group	USA	Aviation	43.7	2050	Yes	Yes	Yes	https://www.aa.com/content/images/customer-service/about-us/corporate-governance/aag-esg-report-2019-2020.pdf?anchorLocation=DirectURL&title=esgreport
105	Best Buy	USA	Retail	43.6	2040	No	Yes	No	https://corporate.bestbuy.com/best-buy-signs-the-climate-pledge-accelerating-sustainability-goals/
105	Talanx	GER	Finance	43.6	2019	No	Unclear	No	https://www.talanx.com/en/newsroom/press_articles/talanx_signs_up_to_un_pri
107	Volvo Group	SWE	Energy & Utility	43.4	2050	No	Unclear	Yes	https://www.volvogroup.com/en-en/sustainability/climate-goals-strategy/reducing-carbon-emissions.html
108	Rio Tinto	GBR	Basic Raw Materials	43.2	2050	Unclear	Yes	No	https://www.riotinto.com/en/news/releases/2020/Rio-Tinto-to-invest-1-billion-to-help-meet-new-climate-change-targets
109	PricewaterhouseCoopers International	GBR	Business Services & Supplies	43	2030	Yes	Yes	Unclear	https://www.pwc.com/gx/en/about/net-zero.html
109	Woolworths	AUS	Retail	43	2050	Unclear	Unclear	Unclear	https://www.woolworthsgroup.com.au/page/media/Latest_News/woolworths-group%E2%80%99s-2030-emissions-reduction-targets-endorsed-by-un-backed-science-based-targets-initiative
111	Ikea	NLD	Consumer Products and Durables	42	2030	Yes	Yes	No	https://www.ikea.com/gb/en/this-is-ikea/people-planet/energy-resources/
112	Dow	USA	Chemicals	41.8	2050	No	Unclear	Yes	https://corporate.dow.com/en-us/science-and-sustainability/commits-to-reduce-emissions-and-waste.html
113	M&G	GBR	Finance	41.7	2050	Yes	Unclear	No	https://docs.mandg.com/docs/Europe/MandG-approach-to-climate-change.pdf
114	Nike	USA	Fashion/Apparel	41.3	2050	Unclear	Unclear	Yes	https://news.nike.com/news/nike-move-to-zero-climate-change-initiative
115	Deutsche Lufthansa	GER	Aviation	40.8	2030	No	Yes	Yes	https://www.lufthansagroup.com/media/downloads/en/responsibility/LH-sustainability-report-2019.pdf
116	Sanofi	FRA	Pharma & Biotech	40.4	2050	Yes	Unclear	Yes	https://www.sanofi.com/en/our-responsibility/planet-mobilization
117	Daiwa House Industry	JPN	Construction and Construction Materials	40	2055	No	Yes	Yes	https://www.daiwahouse.com/English/sustainable/eco/vision/
118	Iberdrola	ESP	Energy & Utility	39.7	2050	Yes	Yes	Yes	https://www.iberdrola.com/sustainability/against-climate-change/climate-change-greenhouse-gas-emissions
119	Moller-Maersk	DNK	Logistics	38.9	2050	Unclear	Unclear	No	https://www.maersk.com/news/articles/2019/06/26/towards-a-zero-carbon-future
120	BBVA-Banco Bilbao Vizcaya	ESP	Finance	38.3	2020	Unclear	Yes	No	https://www.bbva.com/en/as-of-january-1st-bbva-set-an-internal-price-for-its-co2-emissions-and-commits-to-being-carbon-neutral-in-2020/
121	Deutsche Bank	GER	Finance	37.7	2012	No	Yes	No	https://www.db.com/newsroom_news/2018/cookstoves-and-wind-parks-how-deutsche-bank-is-helping-to-create-a-low-carbon-economy-en-11749.htm
122	Enbridge	CAN	Energy & Utility	37.5	2050	Yes	Unclear	No	https://www.enbridge.com/sustainability-reports/executive-summary/climate-and-energy-solutions
123	Phoenix Group Holdings	GBR	Energy & Utility	37.1	2030	Yes	Unclear	No	https://www.thephoenixgroup.com/corporate-responsibility/environment.aspx
124	J Sainsbury	GBR	Food/Beverages	37	2040	No	Unclear	No	https://www.about.sainsburys.co.uk/making-a-difference/netzero
124	Mars	USA	Food/Beverages	37	2040	Yes	Yes	No	https://www.mars.com/global/about-us/policies-and-practices/climate-action-position-statement
126	Vale	BRA	Basic Raw Materials	36.2	2050	Unclear	Unclear	No	http://www.vale.com/esg/en/Pages/ClimateChange.aspx#:~:text=In%20December%202019%2C%20Vale%20assumed,of%20up%20to%202%20%C2%BAC.
127	Munich Re	GER	Finance	36.1	2050	No	Unclear	No	https://www.munichre.com/topics-online/en/climate-change-and-natural-disasters/climate-change/climate-needs-market-economy.html
128	DuPont de Nemours	USA	Chemicals	35.7	2050	Yes	Unclear	No	https://www.dupont.com/content/dam/dupont/amer/us/en/corporate/about-us/Sustainability/Dupont%202020%20GRI%20Index_xfinal.pdf
128	Fujitsu	JPN	Technology Hardware and Equipment	35.7	2050	No	Yes	Yes	https://www.fujitsu.com/global/microsite/fujitsu-climate-and-energy-vision/#:~:text=The%20Fujitsu%20Group%20has%20established,to%20climate%20change%2C%20through%20provision
130	Aisin Seiki	JPN	Consumer Products and Durables	34.8	2050	No	No	Yes	https://www.aisin.com/csr/environment/carbon/
131	Chubb	CHE	Finance	34	2035	Yes	Unclear	No	https://www.chubb.com/us-en/about-chubb/environment.aspx#:~:text=In%20May%202019%2C%20Chubb%20announced,emissions%20levels%20as%20the%20baseline.
132	Shinhan Financial Group	KOR	Finance	33.9	2050	Unclear	Yes	Unclear	https://www.eco-business.com/news/koreas-shinhan-financial-group-declares-net-zero-ambition/?sw-signup=true
133	L'Oréal	FRA	Consumer Products and Durables	33.4	2050	Yes	Unclear	Yes	https://www.loreal-finance.com/eng/news-events/loreal-recognized-global-compact-lead-united-nations-and-steps-its-climate-action
134	British American Tobacco	USA	Food/Beverages	33	2030	No	Unclear	Yes	https://www.bat.com/group/sites/UK__9D9KCY.nsf/vwPagesWebLive/DOAWWEKR/$file/BAT_Sustainability_Strategy_Report_2019.pdf
134	Canon	JPN	Technology Hardware and Equipment	33	2030	No	Yes	Yes	https://global.canon/en/csr/report/pdf/canon-sus-2019-e-18.pdf
136	Credit Suisse Group	CHE	Finance	32.8	2050	Yes	Yes	No	https://www.credit-suisse.com/about-us/en/our-company/corporate-responsibility/environment/greenhouse-gas-neutrality.html
137	Bridgestone	JPN	Consumer Products and Durables	32.3	2050	No	Unclear	Yes	https://www.bridgestone.com/responsibilities/environment/reduce_co2/
138	Inditex	ESP	Fashion/Apparel	31.6	2050	Unclear	Unclear	No	https://www.inditex.com/our-commitment-to-the-environment/climate-change-and-energy
139	Capital One Financial	USA	Finance	31.1	2018	Yes	No	Yes	https://www.capitalone.com/about/newsroom/climate-change-journey-2030/
139	Medtronic	IRL	Health Care	31.1	2030	Unclear	Yes	No	https://www.medtronic.com/us-en/about/citizenship/promoting-environmental-stewardship/reducing-footprint.html
139	SAP	DEU	ICT	31.1	2025	No	Yes	No	https://news.sap.com/2017/05/sap-to-go-carbon-neutral-by-2025/
142	Air France-KLM	FRA	Aviation	30.4	2050	No	Yes	No	https://sustainabilityreport2019.airfranceklm.com/
142	Schneider Electric	FRA	Technology Hardware and Equipment	30.4	2050	Yes	Unclear	Yes	https://sdreport.se.com/en/climate-overview
142	Veolia Environnement	FRA	Energy & Utility	30.4	2050	Unclear	Yes	No	https://www.veolia.com/en/csr-climate-change/what-veolia-doing-align-its-strategy-target-limiting-global-warming-2degc-end-century-ie-attaining
145	Philip Morris International	USA	Food/Beverages	30.2	2030	No	Yes	No	https://www.pmi.com/media-center/press-releases/press-release-details/?newsId=21571
146	Subaru	JPN	Consumer Products and Durables	30	2051	No	Unclear	Yes	https://www.subaru.co.jp/en/csr/subaru_csr/sixpriority/environment.html
147	Takeda Pharmaceutical	JPN	Pharma & Biotech	29.7	2040	No	Yes	Yes	https://www.takeda.com/corporate-responsibility/environment/commitment-to-carbon-neutrality-at-takeda/#:~:text=By%202040%2C%20Takeda%20commits%20to,efforts%2C%20and%20by%20addressing%20remaining
148	BT Group	GBR	ICT	29.6	2045	No	No	No	https://www.bt.com/about/digital-impact-and-sustainability/tackling-climate-change/the-road-to-net-zero#accordion-1
149	ConocoPhillips	USA	Energy & Utility	29.5	2050	Yes	Unclear	No	https://www.conocophillips.com/sustainability/managing-climate-related-risks/metrics-targets/ghg-target/
150	Bank of Montreal	CAN	Finance	29.1	2010	Yes	Yes	Yes	https://corporate-responsibility.bmo.com/our-practices/environmental-stewardship/enviro-targets-performances/
151	PKN Orlen	PLN	Energy & Utility	29	2050	No	Unclear	No	https://www.orlen.pl/EN/PressOffice/Pages/PKN-ORLEN-to-be-emission-neutral-by-2050.aspx
152	Centrica	GBR	Energy & Utility	28.9	2050	Unclear	No	No	https://www.centrica.com/media/4186/pathway-to-net-zero.pdf
153	Barclays	GBR	Finance	28.8	2050	Yes	Yes	Yes	https://home.barclays/society/our-position-on-climate-change/
154	International Airlines	GBR	Aviation	28.6	2050	No	Yes	Yes	https://www.iairgroup.com/en/newsroom/press-releases/newsroom-listing/2019/net-zero-emissions#:~:text=International%20Airlines%20Group%20(IAG)%20is,global%20warming%20to%201.5%20degrees.
155	Hewlett Packard Enterprise	USA	Technology Hardware and Equipment	28.4	2050	Yes	Yes	Yes	https://www.hpe.com/us/en/pdfViewer.html?docId=a00100912&parentPage=/us/en/living-progress/carbon-footprint&resourceTitle=2020+Climate+Goals
155	Hewlett-Packard	USA	ICT	28.4	2050	Yes	Unclear	No	https://www8.hp.com/us/en/hp-information/environment/footprint.html
157	Danone	FRA	Food/Beverages	28.3	2050	Yes	Yes	Yes	https://www.danone.com/impact/planet/towards-carbon-neutrality.html
158	Safran	FRA	Technology Hardware and Equipment	28.1	2050	Unclear	Unclear	No	https://www.safran-group.com/file/download/safran_ri_2019_uk_mel.pdf
159	NEC	JPN	Technology Hardware and Equipment	28	2050	No	Yes	Yes	https://www.nec.com/en/global/csr/eco/risk.html
160	Commonwealth Bank	AUS	Finance	27.3	2050	No	Unclear	No	https://www.commbank.com.au/content/dam/commbank/about-us/shareholders/pdfs/results/fy20/cba-2020-annual-report-print.pdf
161	Michelin Group	FRA	Automotive	27	2050	No	Unclear	No	https://www.michelin.com/en/press-releases/michelins-co2-reduction-targets-approved-by-sbti/
162	LafargeHolcim	CHE	Basic Raw Materials	26.9	2050	No	Yes	Yes	https://www.lafargeholcim.com/our-climate-pledge
163	Starbucks	USA	Food/Beverages	26.7	2050	No	Unclear	No	https://news.microsoft.com/2020/07/20/nine-leading-businesses-launch-new-initiative-to-accelerate-progress-to-a-net-zero-future/
164	Adecco	USA	Business Services & Supplies	26.2	2030	No	Yes	No	https://ar.adeccogroup.com/2019/documents/Adecco_Group_2019AR_double_page_format.pdf
164	AstraZeneca	GBR	Pharma & Biotech	26.2	2030	Yes	No	Yes	https://www.astrazeneca.com/media-centre/articles/2020/ambition-zero-carbon-22012020.html
166	Nokia	FIN	Technology Hardware and Equipment	25.8	2030	No	Unclear	Yes	https://www.nokia.com/about-us/sustainability/combatting-climate-change/our-operations/
167	Sodexo	FRA	Food/Beverages	25.2	2050	Unclear	Yes	No	https://be.sodexo.com/files/live/sites/com-be/files/Documents/Croissance%20responsable/Persbericht%20Sodexo-CO2Logic%20FR.pdf
168	Duke Energy	USA	Energy & Utility	25.1	2050	No	Yes	No	https://www.duke-energy.com/_/media/pdfs/our-company/climate-report-2020.pdf?la=en
169	Adidas	GER	Fashion/Apparel	25	2050	Unclear	Yes	No	https://www.adidas-group.com/en/sustainability/managing-sustainability/environmental-approach/#/unser-ansatz/
170	H&M - Hennes & Mauritz	SWE	Fashion/Apparel	24.8	2040	Yes	Unclear	Yes	https://about.hm.com/content/dam/hmgroup/groupsite/documents/masterlanguage/CSR/reports/2018_Sustainability_report/HM_Group_SustainabilityReport_2018_%20FullReport.pdf
171	Naturgy Energy Group	ESP	Energy & Utility	24.2	2050	Yes	Yes	Yes	https://www.naturgy.com/en/files/INFORME_DE_HUELLA_DE_CARBONO_2018v6EN.pdf
171	Olam International	SGP	Food/Beverages	24.2	2050	Yes	Yes	Yes	https://www.olamgroup.com/content/dam/olamgroup/investor-relations/ir-library/annual-reports/annual-reports-pdfs/olam-annual-report-fy19_3-in-1.pdf
173	ANZ	AUS	Finance	23.9	2010	Yes	Yes	Yes	https://www.anz.com.au/content/dam/anzcomau/documents/pdf/aboutus/ncos-pds-2019.pdf
174	Ericsson	SWE	ICT	23.8	2030	Yes	Yes	Yes	https://exponentialroadmap.org/wp-content/uploads/2019/09/ExponentialRoadmap_1.5_20190919_Single-Pages.pdf
175	Baker Hughes Company	USA	Energy & Utility	23.6	2050	No	Unclear	No	https://www.bakerhughes.com/company/news/bhge-commits-reducing-co2-equivalent-emissions-net-zero-2050-and-partnering-customers
176	Daikin Industries	JPN	Finance	23.5	2050	Yes	Yes	Yes	https://www.daikin-ce.com/en_us/press-releases/2020/daikin-vrv-summit.html
176	Royal Bank of Scotland	GBR	Finance	23.5	2025	Yes	Unclear	Yes	https://investors.natwestgroup.com/~/media/Files/R/RBS-IR/results-center/rbsg-ara-2019-140220-0245-v3.pdf
178	Cummins	USA	Finance	22.6	2050	No	Unclear	No	https://www.cummins.com/news/2019/11/15/new-cummins-strategy-address-climate-change-conserve-natural-resources
179	Henkel	GER	Consumer Products and Durables	22.5	2040	No	No	Yes	https://www.henkel.com/press-and-media/press-releases-and-kits/2020-03-05-henkel-sets-new-and-ambitious-targets-for-sustainable-packaging-and-climate-protection-1041344
180	Wm Morrison Supermarkets	GBR	Food/Beverages	22.4	2040	No	Unclear	Yes	https://www.morrisons-corporate.com/cr/policy/carbon-management/
181	Sekisui House	JPN	Construction and Construction Materials	22.1	2050	No	No	Yes	https://www.sekisuihouse.co.jp/library/english/company/sustainable/2019/all-A3.pdf
182	Sharp	JPN	Consumer Products and Durables	21.9	2050	No	Unclear	Yes	https://global.sharp/corporate/eco/environment/climate_change/#anc01
183	Philips	NLD	Technology Hardware and Equipment	21.8	2020	Unclear	Yes	No	https://www.philips.com/a-w/about/news/archive/standard/news/press/2018/20181206-philips-sets-new-co2-emission-targets-for-the-2020-2040-period-approved-by-the-science-based-targets-initiative.html
184	Fujifilm Holdings	JPN	Technology Hardware and Equipment	21.7	2030	Yes	Yes	Yes	https://www.fujifilmholdings.com/en/sustainability/svp2030/environment/01.html
185	TUI	GER	Travel & Hospitality	21.6	2050	No	Yes	Yes	https://www.tuigroup.com/damfiles/default/tuigroup-15/de/nachhaltigkeit/berichterstattung-downloads/2020/tui-group-cdp-climate-change.pdf-795587ff97e6611e27f1c170f5cb0d48.pdf
185	Union Pacific	USA	Logistics	21.6	2050	Yes	Unclear	No	https://www.up.com/media/releases/200310-science-based-targets.htm
187	PNC Financial Services	USA	Finance	21.5	2035	No	Unclear	No	https://www.pnc.com/en/about-pnc/corporate-responsibility/corporate-social-responsibility/communities-green/sustainable-operations.html
188	NAB - National Australia Bank	AUS	Finance	21.4	2010	Yes	Yes	Yes	https://www.nab.com.au/content/dam/nabrwd/documents/reports/corporate/carbon-neutral-report-2010.pdf
188	Netflix	USA	Media	21.4	2022	Yes	Yes	Yes	https://about.netflix.com/en/news/net-zero-nature-our-climate-commitment
190	Rolls-Royce Holdings	GBR	Technology Hardware and Equipment	21.2	2050	Unclear	Unclear	No	https://www.rolls-royce.com/media/press-releases/2020/05-06-2020-rr-puts-net-zero-carbon-by-2050-at-the-heart-of-future-innovation-and-growth.aspx
191	Kuehne & Nagel International	CHE	Logistics	21	2030	No	Yes	Yes	https://home.kuehne-nagel.com/-/company/corporate-social-responsibility/carbon-offset
192	Eaton	IRL	Finance	20.9	2030	Yes	Yes	Yes	https://www.eaton.com/content/dam/eaton/company/sustainability/files/eaton-sustainability-report.pdf
192	KT	KOR	ICT	20.9	2030	No	Yes	Yes	https://corp.kt.com/eng/archive/ipgrpt/attach/now/IR2019_ENG_KTValueEnhancement_.pdf
194	Bank of New York Mellon	USA	Finance	20.8	2015	Yes	No	Yes	https://www.bnymellon.com/content/dam/bnymellon/documents/pdf/2019-csr-report-overview.pdf.coredownload.pdf
194	Southern Company	USA	Energy & Utility	20.8	2050	Yes	Unclear	No	https://www.southerncompany.com/corporate-responsibility/environment/air-and-climate.html#:~:text=Southern%20Company%20is%20transitioning%20our,zero%20carbon%20operations%20by%202050.
196	HDFC Bank	IND	Finance	20.7	2050	No	Unclear	Yes	https://v1.hdfcbank.com/csr/FY-2018-19/emissions-climate-change.html
197	ING Group	NDL	Finance	20.5	2007	No	Yes	No	https://www.ing.com/Sustainability/Sustainability-direction/Climate-action.htm
198	CarMax	USA	Retail	20.3	2030	Yes	Yes	No	https://socialresponsibility.carmax.com/greenhouse-feasibility.html
199	Japan Tobacco	JPN	Food/Beverages	20	2030	Yes	Unclear	No	https://www.jti.com/about-us/sustainability/were-serious-about-protecting-environment#element--4897
199	Suez	FRA	Energy & Utility	20	2050	Yes	Yes	No	https://www.suez.com/en/who-we-are/a-committed-group/fight-climate-change
201	Wesfarmers	AUS	Food/Beverages	19.9	2050	Unclear	Unclear	No	https://www.wesfarmers.com.au/sustainability/our-stories/climate-action-on-the-path-to-net-zero
202	Asahi Group Holdings	JPN	Food/Beverages	19.2	2050	Yes	No	Yes	https://www.asahigroup-holdings.com/en/csr/environment/greenhousegases.html#:~:text=Asahi%20Carbon%20Zero%3A%20the%20Asahi,medium%2D%20to%20long%2Dterm%20goals&text=With%20Asahi%20Carbon%20Zero%2C%20the,with%202015%20levels)%20by%202030.
203	BayWa	GER	Business Services & Supplies	19.1	2030	No	Yes	No	https://www.baywa.com/binaries/pdf/content/documents/baywacms/downloadcenter/nachhaltigkeitsberichte/nachhaltigkeitsbericht-2018/nachhaltigkeitsbericht-2018/baywacms%3Adownloadpdf/Nachhaltigkeitsbericht_2018_BayWa_d.pdf
203	Isuzu Motors	JPN	Automotive	19.1	2050	Yes	Unclear	Yes	https://www.isuzu.co.jp/world/corporate/environment/index.html
205	National Grid	USA	Energy & Utility	19	2050	Unclear	Unclear	No	https://www.nationalgrid.com/stories/journey-to-net-zero/national-grids-net-zero-commitment
206	NN Group	NLD	Finance	18.9	2017	No	Yes	No	https://www.nn-group.com/sustainability/ratings-and-facts-and-figures-1.htm
206	Obayashi	JPN	Construction and Construction Materials	18.9	2050	Unclear	Unclear	No	https://www.challenge-zero.jp/en/casestudy/349
208	Kimberly-Clark	USA	Consumer Products and Durables	18.8	2039	Yes	Unclear	Yes	https://investor.kimberly-clark.com/news-releases/news-release-details/kimberly-clark-receives-sbti-approval-its-expanded-science-based
209	Hindalco Industries	IND	Basic Raw Materials	18.6	2050	Unclear	Yes	No	https://www.aninews.in/news/business/indian-industry-leaders-sign-up-for-near-zero-emissions-by-205020200925133530/
210	Occidental Petroleum	USA	Energy & Utility	18.5	2040	Unclear	Unclear	No	https://www.youtube.com/watch?v=LigtAFB-z_s&feature=youtu.be
210	Ricoh	JPN	Technology Hardware and Equipment	18.5	2050	No	Unclear	No	https://www.ricoh.co.uk/about-us/sustainability/approach-sustainability.html#:~:text=Our%20global%20environmental%20goals&text=As%20part%20of%20these%20goals,in%20our%20Environmental%20Action%20Plans.
212	AECOM Technology	USA	Technology Hardware and Equipment	18.4	2025	Yes	Unclear	Yes	https://aecom.com/about-aecom/sustainability/
212	Kajima	JPN	Construction and Construction Materials	18.4	2050	No	Unclear	Yes	https://www.kajima.co.jp/english/csr/environment/target/index.html
212	Skanska	SWE	Construction and Construction Materials	18.4	2045	Yes	Unclear	Yes	https://group.skanska.com/sustainability/sustainability-focus-areas/green/carbon/#:~:text=Skanska%20measures%20carbon%20footprints%20on,50%20percent%20reduction%20by%202030.
215	British Airways	GBR	Aviation	18.2	2050	Yes	Yes	Yes	https://www.iairgroup.com/~/media/Files/I/IAG/documents/IAG%20Annual%20report%20and%20accounts%202019.pdf
216	Bertelsmann	GER	Media	18	2030	Yes	Yes	Yes	https://www.bertelsmann.de/verantwortung/strategie/themenschwerpunkte/
216	Jones Lang LaSalle	USA	Construction and Construction Materials	18	2050	No	Unclear	Yes	https://www.us.jll.com/en/newsroom/jll-to-cut-carbon-emissions-by-over-two-thirds
218	Kering	FRA	Consumer Products and Durables	17.8	2018	Yes	Yes	Yes	https://www.kering.com/en/news/kering-commits-to-full-carbon-neutrality-across-the-group
218	Kirin Holdings	JPN	Food/Beverages	17.8	2050	No	Unclear	Yes	https://www.kirinholdings.co.jp/english/csv/env/climatechange.html
218	Vivendi	FRA	ICT	17.8	2050	Unclear	Unclear	No	http://vivendi.digital-publication.com/document-enregistrement-universel-2019/en/catalogue/index.html#page/52-53
221	PayPal	USA	Finance	17.5	2050	Unclear	Unclear	No	https://newsroom.paypal-corp.com/2020-09-21-our-commitment-to-combatting-the-climate-crisis
222	PG&E	USA	Energy & Utility	17.1	2045	No	Yes	Yes	https://www.pgecorp.com/corp_responsibility/reports/2017/en02_climate_change.html
222	Salesforce.com	USA	ICT	17.1	2017	No	Yes	Yes	https://www.salesforce.com/blog/2017/04/salesforce-net-zero-greenhouse-gas.html
224	EDP - Energias de Portugal	PRT	Energy & Utility	17	2050	Yes	Unclear	No	https://www.edp.com/en/sustainability/environmental-dimension/climate-change/climate-change
224	El Corte Inglés	ESP	Retail	17	2050	Unclear	Unclear	Unclear	https://climateaction.unfccc.int/views/stakeholder-details.html?id=8672
224	Lixil Group	JPN	Construction and Construction Materials	17	2050	No	Unclear	No	https://www.lixil.com/en/sustainability/environment/ghg.html
224	Neste	FIN	Energy & Utility	17	2035	Unclear	Yes	No	https://www.neste.com/releases-and-news/climate-change/neste-sets-ambitious-target-carbon-neutral-production-2035
228	WPP	GBR	Media	16.9	2025	No	Yes	Yes	https://www.wpp.com/-/media/project/wpp/files/sustainability/reports/2019/wpp_sustainability_report_environment_2019.pdf?la=en
229	General Mills	USA	Food/Beverages	16.8	2050	Yes	Unclear	Yes	https://www.generalmills.com/en/News/Issues/climate-policy
230	Telstra	AUS	ICT	16.6	2020	No	Yes	No	https://exchange.telstra.com.au/carbon-neutral/
230	Trane Technologies	IRL	Automotive	16.6	2030	No	Unclear	No	https://www.tranetechnologies.com/en/index/sustainability/sustainability-reports/2019-esg-report/environment/emissions-refrigerants.html
232	Scor	FRA	Finance	16.5	2050	Yes	Yes	No	https://www.intelligentinsurer.com/news/scor-promises-to-be-carbon-neutral-by-2050-joins-un-backed-net-zero-alliance-22392#:~:text=France%2Dbased%20global%20reinsurer%20SCOR,to%20carbon%20neutrality%20by%202050.
233	Dominion Energy	USA	Energy & Utility	16.4	2050	Yes	Unclear	No	https://news.dominionenergy.com/2020-02-11-Dominion-Energy-Sets-New-Goal-of-Net-Zero-Emissions-by-2050
233	GAP	USA	Fashion/Apparel	16.4	2050	Yes	Unclear	No	https://www.gapincsustainability.com/environment/doing-our-part-climate;
233	Reckitt Benckiser Group	GBR	Consumer Products and Durables	16.4	2040	Yes	Yes	Yes	https://www.rb.com/media/5380/climate-change.pdf
236	Edp-energias De Portugal	PRT	Energy & Utility	16.1	2050	No	Unclear	Yes	https://www.edp.com/en/news/2020/10/30/edp-announces-a-more-ambitious-2030-decarbonization-goal-line-climate-science
237	Danske Bank	DNK	Finance	16	2009	Yes	Yes	Yes	https://danskebank.com/-/media/danske-bank-com/file-cloud/2020/2/statement-of-carbon-neutrality-2019.pdf?rev=1ab49c5978844a82a00e012a131df1d8&sc_lang=da&hash=18D85A18377EBABB59BC76038DE94080
237	Vattenfall	SWE	Energy & Utility	16	2050	Unclear	Unclear	Unclear	https://group.vattenfall.com/what-we-do/roadmap-to-fossil-freedom/co2-roadmap
239	Bombardier	CAN	Technology Hardware and Equipment	15.8	2050	Yes	Yes	No	https://www.bombardier.com/en/sustainability/environment.html
239	Capgemini	FRA	ICT	15.8	2030	No	Yes	Yes	https://www.capgemini.com/gb-en/news/capgemini-announces-ambition-to-become-net-zero-business-by-2030/
239	The EstÃ©e Lauder Companies	USA	Consumer Products and Durables	15.8	2020	Yes	Unclear	Yes	https://www.elcompanies.com/en/news-and-media/newsroom/company-features/2020/cdp
242	Colgate-Palmolive	USA	Consumer Products and Durables	15.7	2040	No	Yes	No	https://investor.colgatepalmolive.com/news-releases/news-release-details/colgate-palmolives-2019-corporate-social-responsibility#:~:text=The%20targets%20include%20net%20zero,2%20billion%20children%20with%20education
243	American Electric	USA	Energy & Utility	15.5	2050	No	Unclear	No	https://aep.com/news/releases/read/1615
243	Waste Management	USA	Business Services & Supplies	15.5	2038	Yes	Yes	Yes	https://sustainability.wm.com/downloads/WM_CDP_Climate_Change_Response.pdf
245	AMP	AUS	Finance	15.3	2013	No	Yes	Yes	https://amp2019.reportonline.com.au/documents/AMP_2019_Sustainability_report.pdf
246	BlackRock	USA	Finance	15.1	2050	Yes	Yes	No	https://www.blackrock.com/corporate/literature/continuous-disclosure-and-important-information/blk-carbon-footprint.pdf
247	Ecolab	USA	Chemicals	15	2050	No	Unclear	No	https://www.ecolab.com/stories/bold-new-climate-commitment
247	Kawasaki Heavy Industries	JPN	Technology Hardware and Equipment	15	2050	Yes	Unclear	Yes	https://global.kawasaki.com/en/corp/sustainability/environment/18_houkokusyo.pdf
249	KBC Group	BEL	Finance	14.9	2050	Unclear	Unclear	Yes	https://www.kbc.com/en/corporate-sustainability/limiting-our-adverse-impact/our-own-environmental-footprint.html
250	Kyocera	JPN	Technology Hardware and Equipment	14.7	2030	No	Unclear	Yes	https://global.kyocera.com/ecology/eco/management/vision.html
250	RWE Group	DEU	Energy & Utility	14.7	2040	No	Unclear	No	https://www.group.rwe/en/press/rwe-ag/2019-09-30-the-new-rwe
252	Husky Energy	CAN	Energy & Utility	14.6	2050	Yes	Yes	No	https://huskyenergy.com/downloads/abouthusky/publications/sustainabledevelopment/ESG-Report-2020/environmental-climate.asp
253	Commerzbank	GER	Finance	14.5	2015	No	Yes	No	https://www.commerzbank.de/en/nachhaltigkeit/gesellschaft/klimaneutralitaet/klimaneutralitaet_1.html
253	Mahindra & Mahindra	IND	Automotive	14.5	2040	Yes	Unclear	Yes	https://www.mahindra.com/resources/pdf/about-us/Sustainability-Review-2018-19.pdf
255	Cenovus Energy	CAN	Energy & Utility	14.4	2050	Yes	Unclear	No	https://www.cenovus.com/responsibility/environment/climate-change.html
256	Daito Trust Construction	JPN	Construction and Construction Materials	14.3	2050	Yes	Unclear	Yes	https://www.kentaku.co.jp/corporate/en/ir/kessan/aqehc4000000bzrr-att/EnvironmentalReport2019.pdf
257	Stanley Black & Decker	USA	Consumer Products and Durables	14.2	2030	No	Unclear	No	https://www.stanleyblackanddecker.com/social-responsibility/create-more-sustainable-world
258	Uber	USA	Mobility Services	14.1	2040	Unclear	Unclear	No	https://www.uber.com/newsroom/driving-a-green-recovery/
259	Melrose Industries	GBR	Finance	14	2019	Unclear	Yes	No	https://www.melroseplc.net/media/2531/esg-report-ar2019.pdf
259	Otto Group	GER	Retail	14	2030	Unclear	Unclear	Unclear	https://www.hamburg-news.hamburg/en/trade-finances/otto-become-climate-neutral-2030/
261	Oji Holdings	JPN	Basic Raw Materials	13.9	2050	No	Unclear	No	https://www.ojiholdings.co.jp/english/environment/basic_policy/vision.html
262	Essity Ab	SWE	Consumer Products and Durables	13.8	2030	Yes	No	Yes	https://mb.cision.com/Main/15798/2704251/966111.pdf
263	Cathay Pacific Airways	HKG	Aviation	13.7	2050	No	Yes	No	https://www.cathaypacific.com/cx/en_HK/about-us/environment/overview/climate-change.html
264	Japan Airlines	JPN	Aviation	13.6	2050	No	Yes	No	https://www.jal.com/en/sustainability/environment/climate-action/#initiative
264	Vestas Wind Systems	DNK	Energy & Utility	13.6	2030	No	No	Yes	https://www.vestas.com/en/media/blog/sustainability/20200604_carbon-neutrality
266	Coles Group	AUS	Retail	13.5	2050	Yes	Unclear	No	https://www.colesgroup.com.au/FormBuilder/_Resource/_module/ir5sKeTxxEOndzdh00hWJw/file/190321_MEDIA_RELEASE_Coles_launches_'together_to_zero'_strategy_to_drive_generational_sustainability.pdf
267	ASML Holding	NLD	Technology Hardware and Equipment	13.4	2025	No	Yes	No	https://www.asml.com/en/company/sustainability
268	Electrolux Group	SWE	Consumer Products and Durables	13.3	2050	No	Unclear	Yes	https://www.electroluxgroup.com/en/electrolux-signs-global-business-pledge-to-limit-global-temperature-rise-to-1-5c-30125/
268	Johnson Matthey	GBR	Chemicals	13.3	2050	Yes	Unclear	No	https://matthey.com/en/markets/energy-generation-and-storage/hydrogen
268	PTT Global Chemical	THA	Chemicals	13.3	2050	Yes	Unclear	Yes	https://www.pttgcgroup.com/storage/sustainability/managing-sustainability/better-environment/climate-strategy/climate-change-strategy/20200608-gc-gas-report-2019.pdf
268	Telenor	NOR	ICT	13.3	2050	No	Unclear	No	https://www.telenor.com/sustainability/responsible-business/environment-and-climate/climate-impact/
268	Textron	USA	Automotive	13.3	2050	No	Unclear	No	https://www.textron.com/assets/CR/2019/ProductSustainabilityHighlights.html
273	Marks & Spencer	GBR	Retail	13.1	2035	No	Yes	Yes	https://corporate.marksandspencer.com/sustainability/business-wide/climate-change
274	ATOS	FRA	ICT	13	2035	Unclear	Yes	Yes	https://atos.net/en/2020/press-release_2020_06_24/atos-commits-to-net-zero-carbon-emissions-by-2035-setting-the-highest-decarbonization-standards-for-its-industry
274	Cemex	MEX	Basic Raw Materials	13	2050	Yes	Yes	Yes	https://www.cemex.com/sustainability/climate-action/our-performance-and-targets
274	Decathlon	FRA	Fashion/Apparel	13	2050	Yes	Unclear	Yes	http://sustainability.decathlon.com/action-areas/challenges-strategies/climate-commitment/
274	Dixons Carphone	GBR	Retail	13	2050	Unclear	Unclear	No	https://www.dixonscarphone.com/sustainable-business/environment
274	Jacobs Engineering	USA	Construction and Construction Materials	13	2020	No	Yes	Yes	https://www.jacobs.com/sites/default/files/2020-04/Jacobs-Climate-Action-Plan.pdf
274	John Lewis	GBR	Consumer Products and Durables	13	2050	Yes	Yes	No	https://www.businessgreen.com/bg/news/3072844/most-ambitious-targets-yet-john-lewis-pledges-to-go-net-zero-emissions-by-2050
274	Nordea Bank	FIN	Finance	13	2050	Yes	Unclear	No	https://insights.nordea.com/en/sustainability/nordea-life-pensions-commits-to-net-zero-emissions-by-2050/
281	Dai Nippon Printing	JPN	Business Services & Supplies	12.9	2050	Yes	Unclear	Yes	https://www.dnp.co.jp/eng/corporate/csr/report/pdf/dnp_env2020e_all.pdf
281	Fortescue Metals Group	AUS	Basic Raw Materials	12.9	2040	Yes	Yes	No	https://www.fmgl.com.au/in-the-news/media-releases/2020/08/24/fortescue%E2%80%99s-inaugural-climate-change-report-outlines-progress-towards-bold-net-zero-emissions-target-by-2040
281	Yara International	NOR	Chemicals	12.9	2050	Yes	Unclear	No	https://www.yara.com/siteassets/news-and-media/yara-corporate-presentation-2020-web.pdf/
284	Biogen	USA	Pharma & Biotech	12.8	2030	Yes	Unclear	Yes	https://www.biogen.com/en_us/yearinreview/sustainablescience.html
284	Infosys	IND	ICT	12.8	2040	Unclear	Yes	No	https://www.infosys.com/newsroom/features/2020/signs-climate-pledge-co-founded.html
286	ICA Gruppen	SWE	Food/Beverages	12.7	2030	Yes	Unclear	No	https://www.icagruppen.se/en/archive/press-archive/2020/icas-new-climate-ambition-cut-customers-climate-impact-in-half-and-achieve-at-least-zero-net-impact-by-2030/
287	Solvay	BEL	Chemicals	12.6	2030	Unclear	No	Yes	https://www.solvay.com/en/press-release/solvay-steps-sustainability-science-based-targets
287	TDK	JPN	Technology Hardware and Equipment	12.6	2020	No	Unclear	No	https://www.jp.tdk.com/corp/ja/news_center/press/aah82600.htm
289	SingTel	SGP	ICT	12.5	2050	Unclear	Unclear	No	https://www.singtel.com/about-Us/news-releases/singtel-one-of-28-global-companies-comited-to-new-climate-targets#:~:text=All%2028%20companies%20have%20committed,by%20no%20later%20than%202050.&text=We%20have%20now%20deepened%20our,and%20net%2Dzero%20by%202050.
290	Qantas Airways	AUS	Aviation	12.4	2050	Unclear	Yes	No	https://www.qantasnewsroom.com.au/media-releases/qantas-group-to-slash-carbon-emissions/
291	State Street	USA	Finance	12.3	2020	No	Yes	No	https://www.statestreet.com/content/dam/statestreet/documents/Articles/Achieving-Carbon-Neutrality_Sustainability-Lessons-in-a-COVID-19-World.pdf
291	VF	USA	Fashion/Apparel	12.3	2050	No	Yes	Yes	https://www.vfc.com/sustainability-and-responsibility/climate
293	QBE Insurance Group	AUS	Finance	12.2	2018	Unclear	Yes	No	https://www.qbe.com/-/media/group/qbe-annual-report-2019.pdf
294	Kesko	FIN	Food/Beverages	12.1	2030	Yes	Unclear	Yes	https://www.kesko.fi/en/media/news-and-releases/news/2020/k-group-raises-climate-goals-to-a-new-level-carbon-neutral-by-2025-zero-emissions-by-2030/
295	Arla Foods	DNK	Food/Beverages	12	2050	No	Yes	No	https://www.arla.com/company/news-and-press/2019/pressrelease/arla-foods-aims-for-carbon-net-zero-dairy-2845602/
295	Bharti Airtel	IND	ICT	12	2050	Yes	Unclear	Yes	https://renewablesnow.com/news/telecoms-industry-sets-pathway-to-achieve-net-zero-emissions-688962/
295	Co-Operative Ltd	GBR	Retail	12	2050	Yes	Yes	Unclear	https://climateaction.unfccc.int/views/cooperative-initiative-details.html?id=94
295	DTE Energy	USA	Energy & Utility	12	2050	No	Yes	No	https://dtecleanenergy.com/
299	Astellas Pharma	JPN	Pharma & Biotech	11.8	2050	No	Unclear	Yes	https://www.astellas.com/en/responsibility/Measures-To-Address-Climate-Change
299	EN+ Group International	RUS	Basic Raw Materials	11.8	2050	Unclear	Unclear	No	https://www.edie.net/news/6/Aluminium-giant-EN--Group-to-develop-net-zero-strategy
301	Crown Holdings	USA	Basic Raw Materials	11.7	2030	No	Unclear	Yes	https://www.crowncork.com/sustainability/twentyby30/climate-action
302	Adobe	USA	ICT	11.6	2035	Yes	No	Yes	https://www.adobe.com/content/dam/cc/en/corporate-responsibility/pdfs/CDPProgrammeResponse2019.pdf
303	Liberty Global	GBR	ICT	11.5	2040	No	Unclear	No	https://digital-strategy.ec.europa.eu/en/news/companies-take-action-support-green-and-digital-transformation-eu
303	Live Nation Entertainment	USA	Media	11.5	2030	Yes	Unclear	No	https://www.livenation.co.uk/sustainabilitycharter
303	Meiji Holdings	JPN	Food/Beverages	11.5	2030	No	Unclear	No	https://www.meiji.com/global/sustainability/caring_for_the_earth/climate_change/
303	Swisscom	CHE	ICT	11.5	2050	No	Yes	No	https://www.swisscom.ch/en/about/medien/news/swisscom-is-climate-positive.html
303	Vistra Energy	USA	Energy & Utility	11.5	2050	No	Unclear	No	https://www.vistracorp.com/wp-content/uploads/2019/10/GHG-Target-2050-FINAL.pdf
303	Xcel Energy	USA	Energy & Utility	11.5	2050	Yes	Unclear	No	https://www.xcelenergy.com/staticfiles/xe/PDF/Xcel%20Energy%20Carbon%20Report%20-%20Feb%202019.pdf
309	CaixaBank	ESP	Finance	11.3	2018	Yes	Yes	Yes	https://www.caixabank.com/responsabilidadcorporativa/medioambiente/eficienciaambiental_en.html
310	Kone	FIN	Technology Hardware and Equipment	11.1	2030	Unclear	Yes	Yes	https://www.kone.com/en/news-and-insights/releases/kone-sets-ambitious-greenhouse-gas-reduction-targets-and-pledges-to-have-carbon-neutral-operations-by-2030-2020-09-28-2.aspx
311	Chanel	FRA	Fashion/Apparel	11	2050	no	Yes	Yes	https://www.google.com/url?sa=t&rct=j&q=&esrc=s&source=web&cd=8&ved=2ahUKEwjCrOaQscnoAhXH0qQKHVt3D30QFjAHegQICBAB&url=https%3A%2F%2Fservices.chanel.com%2Fi18n%2Fnl_NL%2Fpdf%2FChanel-Climate-Publication.pdf&usg=AOvVaw055jl1Rlx3Ti80-SrI3Icm
311	Natura & Co	BRA	Consumer Products and Durables	11	2050	Yes	Yes	No	https://natu.infoinvest.com.br/static/enu/sustentabilidade.asp
311	TELUS	CAN	ICT	11	2030	No	Unclear	No	https://www.telus.com/en/about/sustainability/key-priorities/caring-for-the-planet
314	Swire Pacific	HKG	Real Estate	10.9	2050	No	Yes	No	https://www.swirepacific.com/en/ir/reports/swirepacificAR2013/pdf/en/SwireAR13_e_092_Environment.pdf
315	Boston Scientific	USA	Health Care	10.8	2050	No	Yes	No	https://www.bostonscientific.com/en-EU/about-us/corporate-social-responsibility/planet/climate-change.html
315	Entergy	USA	Energy & Utility	10.8	2050	No	Unclear	No	https://www.entergy.com/environment/goals/
315	HeidelbergCement	GER	Basic Raw Materials	10.8	2050	No	Unclear	No	https://www.heidelbergcement.com/en/pr-13-05-2019
315	Sanlam	ZAF	Finance	10.8	2050	No	No	No	https://www.sanlam.com/investorrelations/downloadscentre/Documents/Sustainability%20reports/Sanlam_Climatewise%20_Report_2019.pdf
319	Tokyu	JPN	Logistics	10.7	2050	No	Unclear	No	https://www.tokyu.co.jp/ir/english/upload_file/m002-m002_09/Tokyu_Integratedreport_2019E_7.pdf
320	Helvetia Holding	CHE	Finance	10.6	2018	No	Yes	No	https://www.helvetia.com/content/dam/os/corporate/web/documents/corporate-responsibility/cr-climate-partner-en.pdf
321	Sekisui Chemical	JPN	Chemicals	10.4	2050	No	Unclear	Yes	https://www.sekisuichemical.com/csr/eco/env_capital/global_warming/index.html
321	Shiseido	JPN	Consumer Products and Durables	10.4	2026	No	Unclear	No	https://corp.shiseido.com/en/sustainability/env/action1.html
323	Akzo Nobel	NLD	Chemicals	10.2	2050	Unclear	Unclear	No	https://www.akzonobel.com/en/about-us/how-we-operate/position-statements/carbon-neutral-2050
323	VMware	USA	ICT	10.2	2020	Yes	Yes	Yes	https://www.vmware.com/radius/achieving-carbon-neutrality/
325	DSM	NDL	Chemicals	10.1	2050	Unclear	No	No	https://www.dsm.com/corporate/sustainability/climate-energy/improving-our-carbon-footprint.html
325	Latam Airlines	CHL	Aviation	10.1	2020	Unclear	Yes	No	https://www.latam.com/vamos/en_un/articles/on-the-road/sustainability-at-latam-carbon-neutral/
325	Lendlease Group	AUS	Real Estate	10.1	2040	Yes	Unclear	Yes	https://www.lendlease.com/au/company/sustainability/our-targets/
325	Polska Grupa Energetyczna	PLN	Energy & Utility	10.1	2050	No	Yes	No	https://www.gkpge.pl/investor-relations/PGE-Group/pge-group-s-strategy
329	Caisse des Dépôts	FRA	Finance	10	2050	Unclear	Unclear	Yes	https://www.caissedesdepots.fr/en/climate-change-caisse-des-depots-group-increases-its-green-financing
329	RELX	GBR	Business Services & Supplies	10	2050	Yes	Unclear	No	https://www.relx.com/corporate-responsibility/being-a-responsible-business/environment#climate-change-statement
331	Carlsberg	DNK	Food/Beverages	9.9	2030	No	Unclear	Yes	https://www.carlsberggroup.com/newsroom/carlsberg-to-achieve-zero-carbon-emissions-at-its-breweries-by-2030-as-part-of-industry-leading-sustainability-ambitions/
332	PGE Polska Grupa Energetyczna	PLN	Energy & Utility	9.8	2050	No	Unclear	No	https://www.gkpge.pl/Press-Center/press-releases/corporate/strategia-grupy-pge-neutralnosc-klimatyczna-w-2050-roku
333	iA Financial Corporation	CAN	Finance	9.7	2050	Yes	Yes	No	https://ia.ca/newsroom/2019/decembre/ia-financial-group-becomes-carbon-neutral
333	News Corp	USA	Media	9.7	2050	No	Unclear	No	https://newscorp.com/wp-content/uploads/2020/06/newscorp_carbonfootprintfy19-2.pdf
333	NRG Energy	USA	Energy & Utility	9.7	2050	Yes	Unclear	Yes	https://www.nrg.com/assets/documents/sustainability/2019-nrg-sustainability-report.pdf
336	Dentsu	JPN	Media	9.6	2030	Yes	Yes	Yes	https://www.dentsu.com/news-releases/dentsu-international-to-be-net-zero-emissions-company-by-2030#top
336	Origin Energy	AUS	Energy & Utility	9.6	2050	No	No	No	https://www.originenergy.com.au/content/dam/origin/about/investors-media/documents/1_5c_paper_final_.pdf
336	Storebrand	NOR	Finance	9.6	2050	Unclear	Unclear	No	https://www.storebrand.no/asset-management/barekraftige-investeringer/var-klimastrategi/_/attachment/inline/4378826b-d7e2-4dc7-a16d-62e1300f2b12:ff7e4727b852f1ad724f84beab0598f045d1d71b/86128%20STB_Clima_policy_investment_rapport.pdf
339	Public Service Enterprise Group	USA	Energy & Utility	9.5	2050	No	Unclear	No	https://corporate.pseg.com/corporatecitizenship/sustainability/climateleadershiplegacy
340	Alstom	FRA	Finance	9.3	2050	No	Unclear	No	https://www.alstom.com/commitments
341	AGL Energy	AUS	Energy & Utility	9.2	2050	Yes	Yes	No	https://www.agl.com.au/-/media/aglmedia/documents/about-agl/asx-and-media-releases/2020/climate-statement-and-commitments-300620.pdf?la=en&hash=EBDA051D480ABE11F5C5D29B96D7276F&hash=EBDA051D480ABE11F5C5D29B96D7276
341	Telia	SWE	ICT	9.2	2030	No	Yes	Yes	https://tesoab5v64mprod.azurewebsites.net/globalassets/telia-company/documents/reports/2019/telia-company--annual-and-sustainability-report-2019.pdf
343	Fifth Third Bank	USA	Finance	9	2019	Yes	Unclear	No	https://www.53.com/content/fifth-third/en/media-center/press-releases/2019/press-release-2019-08-29.html
343	SSE	GBR	Energy & Utility	9	2050	Unclear	Unclear	No	https://www.sse.com/news-and-views/2020/11/sse-commits-to-net-zero-carbon-emissions-by-2050-at-the-latest/
345	Infineon Technologies	GER	Technology Hardware and Equipment	8.9	2030	No	No	Yes	https://www.infineon.com/cms/en/about-infineon/press/press-releases/2020/INFXX202002-030.html?redirId=122056
345	SKF Group	SWE	Basic Raw Materials	8.9	2030	No	Yes	No	https://www.skf.com/il/news-and-events/news/2020/2020-jun-02-skf-factories-to-be-carbon-neutral-by-2030-3684026
347	Voya Financial	USA	Finance	8.8	2017	Yes	Yes	Yes	https://corporate.voya.com/corporate-responsibility/protecting-environment/operational-eco-efficiency
347	Xerox	USA	Business Services & Supplies	8.8	2025	Yes	Unclear	Yes	https://www.xerox.co.uk/en-gb/about/ehs/carbon-footprint-reduction
349	Beiersdorf	GER	Consumer Products and Durables	8.6	2025	No	Unclear	Yes	https://www.beiersdorf.com/newsroom/press-releases/all-press-releases/2019/12/17-beiersdorf-implements-ambitious-climate-target
349	Wipro	IND	ICT	8.6	2050	Unclear	Unclear	No	https://greentechlead.com/climate/transform-to-net-zero-alliance-formed-to-achieve-zero-carbon-emissions-36262
351	Boston Consulting Group	USA	Business Services & Supplies	8.5	2030	Yes	Yes	No	https://www.bcg.com/de-de/about/about-bcg/net-zero
351	Eversource Energy	USA	Energy & Utility	8.5	2030	No	Yes	No	https://www.eversource.com/content/docs/default-source/investors/commitment-to-sustainability.pdf?sfvrsn=4b4ed562_0
351	VakifBank	TUR	Finance	8.5	2050	No	No	Yes	https://www.vakifbank.com.tr/documents/Sustainability-Report-2018.pdf
354	Teck Resources	CAN	Basic Raw Materials	8.4	2050	No	Unclear	No	https://www.teck.com/news/news-releases/2020/teck-announces-goal-of-carbon-neutrality-by-2050
355	Kerry Group	IRL	Food/Beverages	8.1	2050	Unclear	Unclear	No	https://www.kerrygroup.com/investors/results-presentations/2019-Results-16-2-2020-(5.30pm).pdf
355	Mondi	GBR	Basic Raw Materials	8.1	2050	Yes	No	Yes	https://www.mondigroup.com/en/newsroom/press-release/2020/mondi-announces-science-based-targets-to-reduce-greenhouse-gas-emissions/
355	Orsted	DNK	Energy & Utility	8.1	2025	No	Unclear	Yes	https://orsted.com/en/sustainability/combating-climate-change/our-green-transformation
358	Acciona	ESP	Construction and Construction Materials	8	2016	No	Yes	Yes	https://mediacdn.acciona.com/media/3612932/sustainability-master-plan_progress-in-2019.pdf
359	Easyjet	GBR	Aviation	7.9	2050	Yes	Yes	No	https://www.easyjet.com/en/sustainability
360	Knorr-Bremse	GER	Automotive	7.8	2030	No	Yes	No	https://www.knorr-bremse.com/en/media/press-releases/knorr-bremse-launches-next-phase-of-its-climate-strategy-with-a-commitment-to-climate-neutrality-from-2021-onwards.json
360	Sumitomo Metal Mining	JPN	Basic Raw Materials	7.8	2050	No	Yes	No	https://www.smm.co.jp/E/csr/vision/document/pdf/20200304_transcript.pdf
362	RTL Group	LUX	Media	7.7	2030	Yes	Unclear	Yes	https://www.rtlgroup.com/en/corporate_responsibility/our_impact/environment.cfm
362	Sino-Ocean Group Holding	CHN	Real Estate	7.7	2050	Unclear	Unclear	No	https://cj.sina.com.cn/articles/view/2897534761/acb4df2900100qkhn?cre=wappage&mod=r&loc=2&r=0&rfunc=65&tj=wap_news_relate
364	Iberia	GBR	Aviation	7.6	2050	Yes	Yes	No	https://www.iairgroup.com/~/media/Files/I/IAG/documents/IAG%20Annual%20report%20and%20accounts%202019.pdf
364	Nedbank	ZAF	Finance	7.6	2025	No	Yes	Yes	https://www.nedbank.co.za/content/dam/nedbank/site-assets/AboutUs/Information%20Hub/Integrated%20Report/2019/2019%20Sustainable%20Development%20Review(A).pdf
364	New World Development	HKG	Real Estate	7.6	2050	Unclear	Unclear	No	https://sustainability.nwd.com.hk/highlight/taking-action-on-climate-change/
367	Barry Callebaut	CHE	Food/Beverages	7.5	2025	Unclear	Yes	Yes	https://www.barry-callebaut.com/en/group/forever-chocolate/sustainability-reporting/forever-chocolate-progress-report-2018-19/forever-chocolate-thriving-nature
367	WEC Energy Group	USA	Energy & Utility	7.5	2050	No	Yes	No	https://www.wecenergygroup.com/home/generation-reshaping-plan.htm
369	Legrand	FRA	Finance	7.4	2050	No	Yes	Yes	https://www.legrand.be/fr/nouveautes/reduction-des-emissions-et-neutralite-carbone-legrand-accelere-dans-la-lutte-contre-le
370	Zalando	GER	Fashion/Apparel	7.3	2019	Unclear	Yes	Yes	https://corporate.zalando.com/en/newsroom/en/news-stories/zalando-goes-carbon-neutral-starting-today
371	Intuit	USA	ICT	7.1	2030	No	Unclear	No	https://www.intuit.com/company/press-room/press-releases/2019/intuit-announces-50x-climate-positive-target-at-united-nations-climate-action-summit/#:~:text=UN%20Global%20Compact&text=Along%20with%2012%2C000%2B%20signatories%20in,should%20function%20within%20planetary%20boundaries.
372	Bancolombia	COL	Finance	7	2050	Unclear	Yes	Yes	https://www.banktrack.org/download/climate_change_policy_3/climatechangepolicymay2020.pdf
372	Signify	NDL	Consumer Products and Durables	7	2020	Yes	No	No	https://www.signify.com/global/sustainability/carbonneutral
374	CMS Energy	USA	Energy & Utility	6.7	2040	No	Unclear	No	https://micleanenergyplan.com/
375	SGS	CHE	Business Services & Supplies	6.6	2014	No	Yes	Yes	https://www.sgs.com/en/our-company/corporate-sustainability/sustainability-at-sgs/carbon-neutrality
375	Unicharm	JPN	Consumer Products and Durables	6.6	2050	No	Unclear	Yes	http://www.unicharm.co.jp/english/csr/environment/climate_change/index.html
377	Ralph Lauren	USA	Fashion/Apparel	6.4	2030	Yes	No	Yes	https://corporate.ralphlauren.com/on/demandware.static/-/Sites-RalphLauren_Corporate-Library/default/dwd8688705/documents/2020_Global_Citizenship_Sustainability_Report.pdf
378	Nippon Paint	JPN	Chemicals	6.3	2050	No	Unclear	No	https://www.nipponpaint-holdings.com/en/csr/report/pdf/report_17_08.pdf
379	Amadeus IT Group	ESP	Business Services & Supplies	6.2	2019	No	Yes	No	https://corporate.amadeus.com/documents/en/resources/corporate-information/corporate-documents/global-reports/2019/amadeus-global-report-2019.pdf
379	Barratt Developments	GBR	Construction and Construction Materials	6.2	2040	No	Unclear	No	https://www.barrattdevelopments.co.uk/media/media-releases/pr-2020/pr-29-06-20
379	KPN	NDL	ICT	6.2	2030	Unclear	No	Yes	https://www.overons.kpn/en/kpn-in-the-netherlands/sustainabillity/environmentally-aware
379	OMRON	JPN	Technology Hardware and Equipment	6.2	2050	Unclear	Unclear	No	https://www.omron.com/global/en/media/press/2018/07/c0727.html
379	Swedbank	SWE	Finance	6.2	2050	Yes	Yes	Yes	https://internetbank.swedbank.se/ConditionsEarchive/download?bankid=1111&id=WEBDOC-PPE1341622
384	Eisai	JPN	Pharma & Biotech	6.1	2050	No	Unclear	No	https://www.eisai.com/sustainability/environment/low-carbon/index.html
384	Etihad Airways	ARE	Aviation	6.1	2050	yes	Yes	yes	https://www.etihad.com/en/news/etihad-targets-zero-net-carbon-emissions-by-2050-in-expanded-commitment-to-environmental-sustainability
386	Pirelli	ITA	Consumer Products and Durables	6	2030	Unclear	Unclear	Yes	https://d2snyq93qb0udd.cloudfront.net/corporate/20022020_Sustainability_Targets_Industrial_Plan_2020-2022.pdf
387	Ameren	USA	Energy & Utility	5.9	2050	No	Unclear	No	https://electricenergyonline.com/article/energy/category/general/90/857385/ameren-establishes-net-zero-carbon-emissions-goal-and-a-transformative-expansion-of-wind-and-solar-energy.html
387	Axiata Group	MYS	ICT	5.9	2050	Unclear	Unclear	No	https://www.axiata.com/investors/2019/pdf/Axiata%20SNCR19-Safeguarding-Nature-and-Society.pdf
387	Thomson Reuters	CAN	Business Services & Supplies	5.9	2050	Unclear	Unclear	No	https://www.thomsonreuters.com/en/press-releases/2020/april/thomson-reuters-aims-for-net-zero-emissions-by-2050.html
390	Investec	GBR	Finance	5.8	2019	No	Yes	Yes	https://www.investec.com/content/dam/international/corporate-responsibility/corporate-sustainability-report/Investec-2020-Climate-Related-Financial-Disclosures-final.pdf
391	Terumo	JPN	Health Care	5.7	2050	Yes	Unclear	Yes	https://www.terumo.com/sustainability/environment/
392	Levi Strauss & CO	USA	Fashion/Apparel	5.6	2050	yes	unclear	yes	http://www.levistrauss.com/wp-content/uploads/2018/07/LSCO_Climate_Action_Strategy_2025.pdf
392	Yum! Brands	USA	Travel & Hospitality	5.6	2030	Unclear	Unclear	Yes	https://www.csrwire.com/press_releases/45863-yum-brands-annual-global-citizenship-sustainability-report-showcases-company-s-strategic-investment-in-socially-responsible-growth
394	Insurance Australia Group	AUS	Finance	5.5	2012	No	Yes	No	https://www.iag.com.au/safer-communities/our-climate-action-plan
394	ITC	IND	Food/Beverages	5.5	2050	Yes	Yes	Yes	https://economictimes.indiatimes.com/news/company/corporate-trends/itc-achieves-carbon-and-water-positive-status/articleshow/2885024.cms?from=mdr
394	UCB	BEL	Pharma & Biotech	5.5	2030	Yes	Yes	Yes	https://reports.ucb.com/2019/integrated-annual-report/communities-environment/minimizing-our-environmental-footprint/our-progress-against-green-goals.html
397	CNPC Capital	CHN	Finance	5.4	2050	Yes	Unclear	No	http://www.tanpaifang.com/jienenjianpai/2020/0901/73617.html
398	Aeroports de Paris	FRA	Mobility Services	5.3	2030	No	Unclear	No	https://www.parisaeroport.fr/docs/default-source/groupe-fichiers/finance/relations-investisseurs/information-financi%C3%A8re/rapports-annuels/report-on-activity-and-sustainable-development-2019.pdf?sfvrsn=6a15c8bd_4
398	McCormick	USA	Food/Beverages	5.3	2025	Yes	Yes	Yes	https://p.widencdn.net/wieaak/2019_PLP_Progress_Report
398	Vornado Realty	USA	Finance	5.3	2030	No	Yes	No	https://www.responsibilityreports.com/HostedData/ResponsibilityReports/PDF/NYSE_VNO_2019.pdf
401	Kingspan Group PLC	IRL	Construction and Construction Materials	5.2	2020	No	Yes	Yes	https://www.kingspan.com/group/about/sustainability/net-zero-energy
401	LG	KOR	ICT	5.2	2030	Unclear	Yes	Yes	https://www.lg.com/global/sustainability-reports-communications
401	NiSource	USA	Energy & Utility	5.2	2030	Yes	No	Yes	https://www.nisource.com/docs/librariesprovider2/sustainability-archives/2020/2020-cdp-climate-change-response.pdf?sfvrsn=6
401	Tech Mahindra	IND	ICT	5.2	2050	Unclear	Unclear	No	https://www.techmahindra.com/en-in/tech-mahindra-signs-un-global-compact-initiative-statement-on-climate-action/#:~:text=Tech%20Mahindra%20reaffirms%20the%20science,carbon%20footprint%2C%20emissions%20and%20will
405	Ayala Corp	PHL	Finance	5.1	2022	Yes	Yes	No	https://ir.ayalaland.com.ph/sustainability/carbon-neutrality-by-2022/
405	Hasbro	USA	Consumer Products and Durables	5.1	2019	No	Yes	Yes	https://csr.hasbro.com/en-us/news/article?id=news_article_renewable_energy_2018
405	International Flavors & Fragrances	USA	Consumer Products and Durables	5.1	2025	Yes	Unclear	Yes	https://www.iff.com/~/media/Files/I/IFF-V2/documents/iff-sustainability-report-2019.pdf
405	Virgin Media	GBR	ICT	5.1	2050	unclear	unclear	unclear	https://climateaction.unfccc.int/views/stakeholder-details.html?id=6108
409	Experian	IRL	Business Services & Supplies	5	2030	No	Unclear	Yes	https://www.experianplc.com/responsibility/carbon-neutral-commitment/
409	KLP Group	NOR	Finance	5	2010	unclear	Yes	no	https://about.puma.com/en/sustainability/environment/climate
409	Moody's	USA	Business Services & Supplies	5	2050	Yes	Yes	Yes	https://ir.moodys.com/news-and-financials/press-releases/press-release-details/2020/Moodys-Announces-Environmental-Sustainability-Commitments/default.aspx
409	Puma	GER	Fashion/Apparel	5	2050	unclear	Yes	unclear	https://climateaction.unfccc.int/views/stakeholder-details.html?id=7829
413	Alfa Laval	SWE	Finance	4.9	2030	No	Unclear	Yes	https://www.alfalaval.com/globalassets/documents/about-us/sustainablity/sustainability-reports/alfa-laval-sustainability-report-20194.pdf
413	Woodside Petroleum	AUS	Energy & Utility	4.9	2050	Yes	Yes	No	https://files.woodside/docs/default-source/sustainability-documents/transparency-documents/industry-association-review-report.pdf?sfvrsn=972afad4_2
415	NASDAQ	USA	Finance	4.6	2050	Yes	Yes	Yes	https://www.nasdaq.com/sustainability
415	New Balance	USA	Fashion/Apparel	4.6	2050	unclear	unclear	unclear	https://www.unglobalcompact.org/take-action/events/climate-action-summit-2019/business-ambition/business-leaders-taking-action
415	Yes Bank	IND	Finance	4.6	2050	No	No	Yes	https://www.yesbank.in/pdf/yes_bank_sustainability_performance_review_2019_20_pdf
418	Church & Dwight	USA	Consumer Products and Durables	4.5	2025	Unclear	Yes	Yes	https://churchdwight.com/pdf/Sustainability/2019-Sustainability-Report.pdf
418	Dassault Systemes	Frau	ICT	4.5	2040	unclear	unclear	unclear	https://digital-strategy.ec.europa.eu/en/news/companies-take-action-support-green-and-digital-transformation-eu
418	Firmenich	CHE	Food/Beverages	4.5	2050	unclear	unclear	unclear	https://www.newbalance.com/responsible-leadership/environment.html?id=eng
421	IHS Markit	GBR	Business Services & Supplies	4.4	2020	Unclear	Yes	Yes	https://cdn.ihsmarkit.com/www/pdf/IHS-Markit-Corporate-Sustainability-Policy.pdf
421	Tiffany & Co.	USA	Fashion/Apparel	4.4	2050	Yes	Yes	No	https://www.tiffany.com/sustainability/the-planet/efficient-energy/
421	Verbund AG	AUT	Energy & Utility	4.4	2050	unclear	unclear	unclear	https://www.unglobalcompact.org/take-action/events/climate-action-summit-2019/business-ambition/business-leaders-taking-action
424	Brambles	AUS	Business Services & Supplies	4.1	2025	No	Yes	No	https://www.brambles.com/Content/cms/sustainability-2020/Sustainability_Review_2020.pdf
424	Julius Baer Group	CHE	Finance	4.1	2015	No	Yes	Yes	https://www.juliusbaer.com/index.php?eID=dumpFile&t=f&f=66271&token=4a7b9d75849450c7e012b5230f16642ddba02507
424	Santos	AUS	Energy & Utility	4.1	2040	Yes	Yes	No	https://www.santos.com/news/santos-to-be-net-zero-emissions-by-2040/
427	Bankia	ESP	Finance	4	2020	No	Yes	No	https://www.bankia.com/en/communication/news/bankia-committed-becoming-carbon-neutral.html
427	Petronas Chemicals	MYS	Chemicals	4	2050	Yes	Unclear	No	https://www.petronas.com/sustainability/net-zero-carbon-emissions
427	Taiwan Cement	TWN	Basic Raw Materials	4	2050	No	Unclear	No	https://news.cnyes.com/news/id/4520172
430	Deutsche Boerse	GER	Finance	3.7	2050	No	Yes	No	https://www.deutscheboerse.com/resource/blob/248208/4f9df5f26e11fd3f2fe74f2c672db532/data/cdp-programme-response_de.pdf
431	Alliant Energy	USA	Energy & Utility	3.6	2050	No	Yes	No	https://www.alliantenergy.com/AlliantEnergyNews/NewsReleases/NewsRelease072220
431	Asics Corporation	USA	Fashion/Apparel	3.6	2050	yes	unclear	no	https://www.firmenich.com/en_INT/sustainability/co-and-energy.html
431	Central Bank of India	IND	Finance	3.6	2030	No	No	Yes	https://investors.adient.com/~/media/Files/A/Adient-IR/goverance-docs/20200117-adient-sustainability-report-final.pdf
431	Comerica	USA	Finance	3.6	2050	Yes	Yes	No	https://www.comerica.com/content/dam/comerica/en/documents/reports/corporate-responsibility/2019-comerica-cr-report-final.pdf
431	Workday	USA	ICT	3.6	2021	No	Unclear	No	https://blog.workday.com/en-us/2020/journey-to-net-zero-carbon-emissions-at-workday.html#:~:text=In%202016%2C%20Workday%20announced%20its,a%20commitment%20that%20felt%20daunting.
436	Pinnacle West	USA	Finance	3.5	2050	No	Unclear	No	http://www.pinnaclewest.com/corporate-responsibility/environment/clean-energy/default.aspx
437	AIB Group	IRL	Finance	3.4	2030	Yes	Unclear	Yes	https://aib.ie/content/dam/aib/personal/docs/sustainability/aib-sustainability-faq.pdf
437	Synopsys	USA	ICT	3.4	2019	Yes	Yes	Yes	https://www.synopsys.com/company/corporate-social-responsibility/environment.html
437	Virgin Money UK	GBR	Finance	3.4	2030	No	Unclear	No	https://www.virginmoneyukplc.com/corporate-sustainability/environment/
437	Vueling	GBR	Aviation	3.4	2050	yes	Yes	no	https://www.verbund.com/en-at/about-verbund/responsibility/environment/climate-protection
441	Autodesk	USA	ICT	3.3	2050	Yes	Unclear	Yes	https://adsknews.autodesk.com/views/climate-change-policy-cop25
441	Grundfos	DNK	Technology Hardware and Equipment	3.3	2050	unclear	unclear	unclear	https://climateaction.unfccc.int/views/stakeholder-details.html?id=5382
441	Schroders	GBR	Finance	3.3	2050	No	Yes	No	https://www.schroders.com/en/sysglobalassets/schroders/sites/au/insights-images/sustainable-investing-annual-report-2019.pdf
444	Europcar Mobility Group	FRA	Mobility Services	3.2	2050	unclear	unclear	unclear	https://climateaction.unfccc.int/views/stakeholder-details.html?id=8523
445	Burberry	GBR	Fashion/Apparel	3.1	2022	no	No	no	https://www.burberryplc.com/content/burberry/corporate/en/responsibility/focus-areas/company/carbon_and_energy.html
446	Akamai Technologies	USA	Technology Hardware and Equipment	3	2050	Yes	Yes	Yes	https://www.akamai.com/us/en/multimedia/documents/sustainability/2019-akamai-sustainability-report.pdf
446	Boston Properties	USA	Finance	3	2050	No	Unclear	Yes	http://www.bostonproperties.com/pages/sustainability#ClimateChange
446	Mettler-Toledo International	USA	Automotive	3	2020	Yes	Yes	No	https://www.mt.com/dam/MT_F/qualite/METTLER_TOLEDO_Corporate_Responsibility_Report_2020.pdf
449	Air Lingus	GBR	Aviation	2.9	2050	yes	Yes	yes	https://www.iairgroup.com/~/media/Files/I/IAG/documents/IAG%20Annual%20report%20and%20accounts%202019.pdf
450	Transurban Group	AUS	Mobility Services	2.8	2050	No	Unclear	Yes	https://www.transurban.com/content/dam/investor-centre/04/2020-Corporate-Report.pdf
451	Frasers Property	SGP	Real Estate	2.7	2050	No	Unclear	Unclear	https://www.frasersproperty.com/home/frasers-corporate/essentials/shared/dataitems/press-releases/2021/january/frasers-property-commits-to-net-zero-carbon-by-2050
451	ONO Pharmaceutical	JPN	Pharma & Biotech	2.7	2050	Yes	Unclear	Yes	https://ono-csr.disclosure.site/en/themes/108#987
453	Advantest	JPN	Technology Hardware and Equipment	2.5	2050	No	Unclear	No	https://www2.advantest.com/investors/resource/data/FY2020/E_04_IAR2020.pdf
453	Safaricom	KEN	ICT	2.5	2050	No	Yes	Yes	https://www.safaricom.co.ke/sustainabilityreport_2018/ebook/46/#zoom=z
455	GUESS	USA	Fashion/Apparel	2.4	2050	yes	Yes	unclear	https://climateaction.unfccc.int/views/cooperative-initiative-details.html?id=94
455	Ono Pharmaceutical	JPN	Pharma & Biotech	2.4	2050	unclear	unclear	unclear	https://climateaction.unfccc.int/views/stakeholder-details.html?id=9243
457	AvalonBay Communities	USA	Finance	2.3	2030	No	No	Yes	https://www.avaloncommunities.com/about-us/corporate-responsibility/-/media/3D175C5A19B146558DC24B559F03D923.ashx
457	Avis	USA	Mobility Services	2.3	2011	yes	Yes	no	https://production.rent-at-avis.com/avisonline/lu-gb/avis.nsf/c/siteservice,info,avis_and_the_environment
457	Mace	GBR	Construction and Construction Materials	2.3	2022	unclear	unclear	no	https://www.fmj.co.uk/mace-sets-goal-to-be-net-zero-carbon-in-2020/
457	Safaricom	KEN	ICT	2.3	2050	yes	Yes	no	https://www.safaricom.co.ke/images/Downloads/Resources_Downloads/Safaricom2019_Sustainability_Report.pdf
457	United Utilities	GBR	Energy & Utility	2.3	2050	Yes	Yes	Yes	https://www.unitedutilities.com/corporate/responsibility/environment/climate-change/climate-change-mitigation/
462	Lundin Energy	SWE	Energy & Utility	2.2	2030	No	Yes	Yes	https://www.lundin-energy.com/sustainability/climate-change/decarbonisation-strategy/
462	Lyft	USA	Mobility Services	2.2	2016	yes	Yes	no	https://medium.com/@johnzimmer/all-lyft-rides-are-now-carbon-neutral-55693af04f36
462	Tata Steel Europe	GBR	Basic Raw Materials	2.2	2050	yes	Yes	unclear	https://www.tatasteeleurope.com/en/sustainability/steel%E2%80%93for%E2%80%93a%E2%80%93sustainable%E2%80%93future
465	Novozymes	DNK	Chemicals	2.1	2050	yes	Yes	no	https://www.unglobalcompact.org/take-action/events/climate-action-summit-2019/business-ambition/business-leaders-taking-action
465	Shizuoka Bank	JPN	Finance	2.1	2050	No	Unclear	No	https://www.shizuokabank.co.jp/english/pdf/integrated_report_2020.pdf
467	Klepierre	FRA	Finance	1.8	2030	Yes	No	Yes	https://www.klepierre.com/en/finance/societe-generale-esgsri-conference-presentation-en
467	Scentre Group	AUS	Finance	1.8	2030	Yes	Yes	Yes	https://www.scentregroup.com/getmedia/ea47895e-1155-4f75-bb10-1fcdbc515c19/SCG_2019-Responsible-Business-Report
469	Croda International	GBR	Chemicals	1.7	2050	unclear	unclear	unclear	https://climateaction.unfccc.int/views/cooperative-initiative-details.html?id=94
469	Novo Nordisk	DNK	Pharma & Biotech	1.7	2050	yes	Yes	no	https://www.novonordisk.com/sustainable-business/performance-on-tbl/environmental-responsibility/reducing-carbon-emissions/performance-and-how-we-report.html
471	Anglian Water	GBR	Energy & Utility	1.6	2050	yes	Yes	no	https://www.anglianwater.co.uk/in-the-community/protecting-our-environment/climate-change/carbon-management/
471	Shopify	CAN	ICT	1.6	2050	No	Unclear	No	https://news.shopify.com/we-need-to-talk-about-carbon?shpxid=8b6926de-6B06-4D43-6E28-B1285FDFC814
471	Swedish Match	SWE	Food/Beverages	1.6	2050	Yes	Unclear	Yes	https://www.swedishmatch.com/Sustainability/reduce-greenhouse-gases/
474	Atlassian	GBR	ICT	1.4	2050	No	Unclear	No	https://www.atlassian.com/blog/announcements/atlassian-commits-to-the-fight-against-global-climate-change
474	Covivio	FRA	Finance	1.4	2030	No	Unclear	Yes	https://www.covivio.eu/en/wp-content/uploads/sites/3/2020/06/2019-annual-report-on-sustainable-performance.pdf
474	Delivery Hero	GER	Retail	1.4	2021	No	Yes	No	https://www.deliveryhero.com/sustainability/
474	The Body Shop	GBR	Consumer Products and Durables	1.4	2010	unclear	unclear	unclear	https://climateaction.unfccc.int/views/stakeholder-details.html?id=8765
474	Vopak	NDL	Mobility Services	1.4	2050	Unclear	Unclear	No	https://www.vopak.com/sustainability
479	Atlassian Corporation	AUS	ICT	1.2	2050	unclear	unclear	unclear	https://www.unglobalcompact.org/take-action/events/climate-action-summit-2019/business-ambition/business-leaders-taking-action
479	Banque Cantonale Vaudoise	CHE	Finance	1.2	2050	No	Yes	No	https://www.bcv.ch/en/About-us/Corporate-Social-Responsibility/Environmental-sustainability
479	Interface	USA	Construction and Construction Materials	1.2	2050	yes	Yes	unclear	https://climateaction.unfccc.int/views/stakeholder-details.html?id=1979
482	Gecina	FRA	Finance	1.1	2050	Unclear	Yes	No	https://presse.gecina.fr/actualites/gecina-obtient-la-note-maximale-de-a-au-classement-cdp-sur-le-changement-climatique-ed93-b28e9.html
